# Supplementary material for: Interim analyses of a first-in-human phase 1/2 mRNA trial for propionic acidaemia
Source: PubMed Central journal article supplement (PMC11156579; doi:10.1038/s41586-024-07266-7), 2024-04-03
Supplement: 41586_2024_7266_MOESM1_ESM.pdf [file 41586_2024_7266_MOESM1_ESM.pdf]

---

**Supplementary information**

---

**Interim analyses of a first-in-human phase  
1/2 mRNA trial for propionic acidaemia**

---

In the format provided by the  
authors and unedited

---

**Supplementary information**

---

**Interim analyses of a first-in-human phase  
1/2 mRNA trial for propionic acidaemia**

---

In the format provided by the  
authors and unedited

## **Supplementary Information**

**mRNA-3927 Therapy for Propionic Acidemia: Interim Analysis From the First-in-human, Open-label, Nonrandomized, Phase 1/2 PARAMOUNT Study**

**Koeberl et al**

**Supplementary Table 1.** Protocol-required laboratory assessments.

| Laboratory assessments                                                                  | Parameters                                                              | Value exclusionary for study participation                                         |
|-----------------------------------------------------------------------------------------|-------------------------------------------------------------------------|------------------------------------------------------------------------------------|
| <b>Laboratory safety assessments</b>                                                    |                                                                         |                                                                                    |
| Hematology                                                                              | Platelet count                                                          | <75,000 mm <sup>3</sup>                                                            |
|                                                                                         | Red blood cell count                                                    | Not exclusionary                                                                   |
|                                                                                         | Hemoglobin                                                              | <9 g/dL                                                                            |
|                                                                                         | Hematocrit                                                              | Not exclusionary                                                                   |
|                                                                                         | RBC indices:<br>mean corpuscular volume,<br>mean corpuscular hemoglobin | Not exclusionary                                                                   |
|                                                                                         | Percent reticulocytes                                                   | Not exclusionary                                                                   |
|                                                                                         | White blood cell count                                                  | <2000 mm <sup>3</sup>                                                              |
|                                                                                         | Neutrophil count                                                        | <1000 mm <sup>3</sup>                                                              |
|                                                                                         | Neutrophil percent                                                      | Not exclusionary                                                                   |
|                                                                                         | Lymphocyte count/percent                                                | <800 mm <sup>3</sup>                                                               |
|                                                                                         | Monocyte, eosinophil, basophil count/percent                            | Not exclusionary                                                                   |
| Comprehensive metabolic panel <sup>+</sup> (CMP <sup>+</sup> , with amylase and lipase) | Blood urea nitrogen                                                     | Not exclusionary                                                                   |
|                                                                                         | Potassium                                                               | >5.5-6.0 mmol/L or symptomatic and <3.0 mmol/L                                     |
|                                                                                         | Carbon dioxide (bicarbonate)                                            | Not exclusionary                                                                   |
|                                                                                         | Sodium                                                                  | <130 mmol/L and symptomatic or >150 mmol/L and intervention initiated              |
|                                                                                         | Chloride                                                                | Not exclusionary                                                                   |
|                                                                                         | Creatinine                                                              | Not exclusionary (estimated glomerular filtration rate is evaluated instead)       |
|                                                                                         | Glucose (nonfasting)                                                    | Not exclusionary                                                                   |
|                                                                                         | Anion gap                                                               | Not exclusionary                                                                   |
|                                                                                         | Calcium                                                                 | Corrected serum calcium <8.0 mg/dL and symptomatic, or >11.5 mg/dL and symptomatic |
|                                                                                         | Aspartate aminotransferase                                              | >2.0 × ULN                                                                         |
|                                                                                         | Alanine aminotransferase                                                | >2.0 × ULN                                                                         |
|                                                                                         | Total protein                                                           | Not exclusionary                                                                   |
|                                                                                         | Albumin                                                                 | <3.0 g/dL                                                                          |
|                                                                                         | Globulin, albumin/globulin ratio                                        | Not exclusionary                                                                   |
|                                                                                         | Gamma-glutamyl transferase                                              | Not exclusionary                                                                   |
|                                                                                         | Total bilirubin                                                         | >1.5 × ULN                                                                         |
|                                                                                         | Direct bilirubin                                                        | >1.5 × ULN                                                                         |
|                                                                                         | Alkaline phosphatase                                                    | >2.0 × ULN                                                                         |

| <b>Laboratory assessments</b>                     | <b>Parameters</b>                                                       | <b>Value exclusionary for study participation</b>         |
|---------------------------------------------------|-------------------------------------------------------------------------|-----------------------------------------------------------|
|                                                   | Lactate dehydrogenase                                                   | >1.5 × ULN                                                |
|                                                   | Amylase                                                                 | >1.5 × ULN and symptomatic or >2.5 × ULN and asymptomatic |
|                                                   | Lipase                                                                  | >1.5 × ULN and symptomatic or >2.0 × ULN and asymptomatic |
|                                                   | Uric acid                                                               | Not exclusionary                                          |
|                                                   | C-reactive protein                                                      | Not exclusionary                                          |
|                                                   | Phosphorus                                                              | Not exclusionary                                          |
|                                                   | Bicarbonate                                                             | Not exclusionary                                          |
|                                                   | Creatinine phosphokinase                                                | Not exclusionary                                          |
|                                                   | Total cholesterol                                                       | Not exclusionary                                          |
|                                                   | Triglycerides                                                           | Not exclusionary                                          |
| Coagulation                                       | Prothrombin time                                                        | >1.2 × ULN                                                |
|                                                   | Activated partial thromboplastin time                                   | >1.5 × ULN                                                |
| <b>Other safety assessments</b>                   |                                                                         |                                                           |
| Pregnancy test<br>(performed at local laboratory) | β-hCG pregnancy test<br>(as needed for women of childbearing potential) | Positive result                                           |

ULN, upper limit of normal.
